# Supplementary material
Source: publisher figshare collection journal article supplement (https://gsajournals.figshare.com/ndownloader/files/22015050)
Supplement: Supplementary file 1 [file 22015050]

## Sheet: KT30up
Comparison	Condition	GO group	GO ID	GO term	Odds ratio	Expected count	Observed count	Size	Pvalue
KT30 vs V30	KT30	Biological Process	GO:0010906	regulation of glucose metabolic process	66.7722	0.0410358	2	8	0.000710636
KT30 vs V30	KT30	Biological Process	GO:0002478	antigen processing and presentation of exogenous peptide antigen	Inf	0.00512948	1	1	0.00512948
KT30 vs V30	KT30	Biological Process	GO:0002479	antigen processing and presentation of exogenous peptide antigen via MHC class I, TAP-dependent	Inf	0.00512948	1	1	0.00512948
KT30 vs V30	KT30	Biological Process	GO:0045234	protein palmitoleylation	Inf	0.00512948	1	1	0.00512948
KT30 vs V30	KT30	Biological Process	GO:0018230	peptidyl-L-cysteine S-palmitoylation	Inf	0.00512948	1	1	0.00512948
KT30 vs V30	KT30	Biological Process	GO:0051234	establishment of localization	2.18982	10.4539	19	2038	0.00523627
KT30 vs V30	KT30	Biological Process	GO:0070459	prolactin secretion	197.115	0.010259	1	2	0.0102331
KT30 vs V30	KT30	Biological Process	GO:0071312	cellular response to alkaloid	197.115	0.010259	1	2	0.0102331
KT30 vs V30	KT30	Biological Process	GO:0071315	cellular response to morphine	197.115	0.010259	1	2	0.0102331
KT30 vs V30	KT30	Biological Process	GO:0005981	regulation of glycogen catabolic process	197.115	0.010259	1	2	0.0102331
KT30 vs V30	KT30	Biological Process	GO:0014072	response to isoquinoline alkaloid	197.115	0.010259	1	2	0.0102331
KT30 vs V30	KT30	Biological Process	GO:0006706	steroid catabolic process	197.115	0.010259	1	2	0.0102331
KT30 vs V30	KT30	Biological Process	GO:0006707	cholesterol catabolic process	197.115	0.010259	1	2	0.0102331
KT30 vs V30	KT30	Biological Process	GO:0048255	mRNA stabilization	98.5492	0.0153884	1	3	0.0153109
KT30 vs V30	KT30	Biological Process	GO:0009251	glucan catabolic process	98.5492	0.0153884	1	3	0.0153109
KT30 vs V30	KT30	Biological Process	GO:0042754	negative regulation of circadian rhythm	98.5492	0.0153884	1	3	0.0153109
KT30 vs V30	KT30	Biological Process	GO:0044247	cellular polysaccharide catabolic process	98.5492	0.0153884	1	3	0.0153109
KT30 vs V30	KT30	Biological Process	GO:0010595	positive regulation of endothelial cell migration	98.5492	0.0153884	1	3	0.0153109
KT30 vs V30	KT30	Biological Process	GO:0032881	regulation of polysaccharide metabolic process	98.5492	0.0153884	1	3	0.0153109
KT30 vs V30	KT30	Biological Process	GO:0043470	regulation of carbohydrate catabolic process	98.5492	0.0153884	1	3	0.0153109
KT30 vs V30	KT30	Biological Process	GO:0006044	N-acetylglucosamine metabolic process	98.5492	0.0153884	1	3	0.0153109
KT30 vs V30	KT30	Biological Process	GO:0018198	peptidyl-cysteine modification	98.5492	0.0153884	1	3	0.0153109
KT30 vs V30	KT30	Biological Process	GO:0090050	positive regulation of cell migration involved in sprouting angiogenesis	98.5492	0.0153884	1	3	0.0153109
KT30 vs V30	KT30	Biological Process	GO:0007023	post-chaperonin tubulin folding pathway	65.694	0.0205179	1	4	0.0203631
KT30 vs V30	KT30	Biological Process	GO:0045721	negative regulation of gluconeogenesis	65.694	0.0205179	1	4	0.0203631
KT30 vs V30	KT30	Biological Process	GO:0045912	negative regulation of carbohydrate metabolic process	65.694	0.0205179	1	4	0.0203631
KT30 vs V30	KT30	Biological Process	GO:0044724	single-organism carbohydrate catabolic process	9.07652	0.235956	2	46	0.0231844
KT30 vs V30	KT30	Biological Process	GO:0060326	cell chemotaxis	9.07652	0.235956	2	46	0.0231844
KT30 vs V30	KT30	Biological Process	GO:0019318	hexose metabolic process	8.87407	0.241085	2	47	0.024136
KT30 vs V30	KT30	Biological Process	GO:0055085	transmembrane transport	2.12937	5.72963	11	1117	0.0253451
KT30 vs V30	KT30	Biological Process	GO:0010632	regulation of epithelial cell migration	49.2664	0.0256474	1	5	0.0253898
KT30 vs V30	KT30	Biological Process	GO:0043467	regulation of generation of precursor metabolites and energy	49.2664	0.0256474	1	5	0.0253898
KT30 vs V30	KT30	Biological Process	GO:0018095	protein polyglutamylation	49.2664	0.0256474	1	5	0.0253898
KT30 vs V30	KT30	Biological Process	GO:0043535	regulation of blood vessel endothelial cell migration	49.2664	0.0256474	1	5	0.0253898
KT30 vs V30	KT30	Biological Process	GO:0044262	cellular carbohydrate metabolic process	8.49504	0.251344	2	49	0.0260864
KT30 vs V30	KT30	Biological Process	GO:0002474	antigen processing and presentation of peptide antigen via MHC class I	39.4098	0.0307769	1	6	0.0303911
KT30 vs V30	KT30	Biological Process	GO:0043255	regulation of carbohydrate biosynthetic process	39.4098	0.0307769	1	6	0.0303911
KT30 vs V30	KT30	Biological Process	GO:1901135	carbohydrate derivative metabolic process	2.68159	2.4006	6	468	0.0322624
KT30 vs V30	KT30	Biological Process	GO:0038003	opioid receptor signaling pathway	32.8388	0.0359063	1	7	0.0353671
KT30 vs V30	KT30	Biological Process	GO:0043487	regulation of RNA stability	32.8388	0.0359063	1	7	0.0353671
KT30 vs V30	KT30	Biological Process	GO:0042886	amide transport	2.86697	1.85687	5	362	0.037736
KT30 vs V30	KT30	Biological Process	GO:0006486	protein glycosylation	4.19527	0.754033	3	147	0.0395949
KT30 vs V30	KT30	Biological Process	GO:0001649	osteoblast differentiation	28.1452	0.0410358	1	8	0.0403181
KT30 vs V30	KT30	Biological Process	GO:0036211	protein modification process	1.79601	8.68934	14	1694	0.0451377
KT30 vs V30	KT30	Biological Process	GO:0046890	regulation of lipid biosynthetic process	24.625	0.0461653	1	9	0.045244
KT30 vs V30	KT30	Biological Process	GO:1901616	organic hydroxy compound catabolic process	24.625	0.0461653	1	9	0.045244
KT30 vs V30	KT30	Biological Process	GO:0070085	glycosylation	3.91955	0.805328	3	157	0.0466119
KT30 vs V30	KT30	Cellular Component	GO:0000164	protein phosphatase type 1 complex	63.9119	0.0430402	2	8	0.000779444
KT30 vs V30	KT30	Cellular Component	GO:0042825	TAP complex	Inf	0.00538003	1	1	0.00538003
KT30 vs V30	KT30	Cellular Component	GO:1903293	phosphatase complex	16.6448	0.134501	2	25	0.00787611
KT30 vs V30	KT30	Cellular Component	GO:0031300	intrinsic component of organelle membrane	13.1932	0.166781	2	31	0.0119593
KT30 vs V30	KT30	Cellular Component	GO:0016021	integral component of membrane	1.87846	29.9291	38	5563	0.0188044
KT30 vs V30	KT30	Cellular Component	GO:0072357	PTW/PP1 phosphatase complex	47.0556	0.0269001	1	5	0.0266174
KT30 vs V30	KT30	Cellular Component	GO:0000139	Golgi membrane	4.50382	0.70837	3	134	0.0336933
KT30 vs V30	KT30	Cellular Component	GO:0031463	Cul3-RING ubiquitin ligase complex	31.3642	0.0376602	1	7	0.0370685
KT30 vs V30	KT30	Cellular Component	GO:0005779	integral component of peroxisomal membrane	31.3642	0.0376602	1	7	0.0370685
KT30 vs V30	KT30	Cellular Component	GO:0044425	membrane part	1.72161	31.1073	38	5782	0.0390388
KT30 vs V30	KT30	Cellular Component	GO:0030173	integral component of Golgi membrane	26.881	0.0430402	1	8	0.0422526
KT30 vs V30	KT30	Cellular Component	GO:0005871	kinesin complex	23.5185	0.0484202	1	9	0.0474094
KT30 vs V30	KT30	Molecular Function	GO:0070740	tubulin-glutamic acid ligase activity	Inf	0.00466978	1	1	0.00466978
KT30 vs V30	KT30	Molecular Function	GO:0004979	beta-endorphin receptor activity	Inf	0.00466978	1	1	0.00466978
KT30 vs V30	KT30	Molecular Function	GO:0038047	morphine receptor activity	Inf	0.00466978	1	1	0.00466978
KT30 vs V30	KT30	Molecular Function	GO:0015433	peptide antigen-transporting ATPase activity	Inf	0.00466978	1	1	0.00466978
KT30 vs V30	KT30	Molecular Function	GO:0046979	TAP2 binding	Inf	0.00466978	1	1	0.00466978
KT30 vs V30	KT30	Molecular Function	GO:0033781	cholesterol 24-hydroxylase activity	Inf	0.00466978	1	1	0.00466978
KT30 vs V30	KT30	Molecular Function	GO:0008009	chemokine activity	21.9118	0.102735	2	22	0.00467473
KT30 vs V30	KT30	Molecular Function	GO:0015276	ligand-gated ion channel activity	5.73582	0.747165	4	160	0.00663873
KT30 vs V30	KT30	Molecular Function	GO:0004342	glucosamine-6-phosphate deaminase activity	216.217	0.00933956	1	2	0.00931806
KT30 vs V30	KT30	Molecular Function	GO:0038046	enkephalin receptor activity	216.217	0.00933956	1	2	0.00931806
KT30 vs V30	KT30	Molecular Function	GO:0032575	ATP-dependent 5'-3' RNA helicase activity	216.217	0.00933956	1	2	0.00931806
KT30 vs V30	KT30	Molecular Function	GO:0005049	nuclear export signal receptor activity	108.101	0.0140093	1	3	0.0139449
KT30 vs V30	KT30	Molecular Function	GO:0042287	MHC protein binding	108.101	0.0140093	1	3	0.0139449
KT30 vs V30	KT30	Molecular Function	GO:0004712	protein serine/threonine/tyrosine kinase activity	108.101	0.0140093	1	3	0.0139449
KT30 vs V30	KT30	Molecular Function	GO:0001664	G-protein coupled receptor binding	10.4188	0.20547	2	44	0.0179221
KT30 vs V30	KT30	Molecular Function	GO:0016934	extracellular-glycine-gated chloride channel activity	72.0628	0.0186791	1	4	0.0185505
KT30 vs V30	KT30	Molecular Function	GO:0004082	bisphosphoglycerate mutase activity	72.0628	0.0186791	1	4	0.0185505
KT30 vs V30	KT30	Molecular Function	GO:0004619	phosphoglycerate mutase activity	72.0628	0.0186791	1	4	0.0185505
KT30 vs V30	KT30	Molecular Function	GO:0015631	tubulin binding	5.3866	0.588392	3	126	0.0210987
KT30 vs V30	KT30	Molecular Function	GO:0022836	gated channel activity	3.33883	1.59239	5	341	0.021474
KT30 vs V30	KT30	Molecular Function	GO:0015018	galactosylgalactosylxylosylprotein 3-beta-glucuronosyltransferase activity	54.0435	0.0233489	1	5	0.0231349
KT30 vs V30	KT30	Molecular Function	GO:0017080	sodium channel regulator activity	54.0435	0.0233489	1	5	0.0231349
KT30 vs V30	KT30	Molecular Function	GO:0016594	glycine binding	54.0435	0.0233489	1	5	0.0231349
KT30 vs V30	KT30	Molecular Function	GO:0008186	RNA-dependent ATPase activity	43.2319	0.0280187	1	6	0.0276982
KT30 vs V30	KT30	Molecular Function	GO:0015467	G-protein activated inward rectifier potassium channel activity	43.2319	0.0280187	1	6	0.0276982
KT30 vs V30	KT30	Molecular Function	GO:0030374	ligand-dependent nuclear receptor transcription coactivator activity	36.0242	0.0326885	1	7	0.0322404
KT30 vs V30	KT30	Molecular Function	GO:0016881	acid-amino acid ligase activity	36.0242	0.0326885	1	7	0.0322404
KT30 vs V30	KT30	Molecular Function	GO:0008889	glycerophosphodiester phosphodiesterase activity	36.0242	0.0326885	1	7	0.0322404
KT30 vs V30	KT30	Molecular Function	GO:0003724	RNA helicase activity	30.8758	0.0373582	1	8	0.0367618
KT30 vs V30	KT30	Molecular Function	GO:0022892	substrate-specific transporter activity	2.22447	3.85724	8	826	0.0380365
KT30 vs V30	KT30	Molecular Function	GO:0022824	transmitter-gated ion channel activity	6.72172	0.312875	2	67	0.0391174
KT30 vs V30	KT30	Molecular Function	GO:1904680	peptide transmembrane transporter activity	27.0145	0.042028	1	9	0.0412623
KT30 vs V30	KT30	Molecular Function	GO:0008146	sulfotransferase activity	6.42388	0.326885	2	70	0.0423487
KT30 vs V30	KT30	Molecular Function	GO:0022857	transmembrane transporter activity	2.07152	4.67445	9	1001	0.0425364
KT30 vs V30	KT30	Molecular Function	GO:0022838	substrate-specific channel activity	2.73605	1.92862	5	413	0.0436241
KT30 vs V30	KT30	Molecular Function	GO:0005126	cytokine receptor binding	6.06536	0.345564	2	74	0.0468068

## Sheet: KT30down
Comparison	Condition	GO group	GO ID	GO term	Odds ratio	Expected count	Observed count	Size	Pvalue
KT30 vs V30	KT30	Biological Process	GO:0043604	amide biosynthetic process	43.1255	3.28154	62	296	4.01047e-65
KT30 vs V30	KT30	Biological Process	GO:0006518	peptide metabolic process	41.1506	3.40349	62	307	4.70234e-64
KT30 vs V30	KT30	Biological Process	GO:0006412	translation	45.0827	2.81179	57	263	1.85044e-61
KT30 vs V30	KT30	Biological Process	GO:1901566	organonitrogen compound biosynthetic process	21.3479	5.9866	63	540	1.70271e-49
KT30 vs V30	KT30	Biological Process	GO:0009059	macromolecule biosynthetic process	5.8497	20.5983	68	1858	7.13239e-22
KT30 vs V30	KT30	Biological Process	GO:0019538	protein metabolic process	5.08195	30.7977	80	2778	5.2344e-20
KT30 vs V30	KT30	Biological Process	GO:0044249	cellular biosynthetic process	4.73762	25.0218	69	2257	7.98856e-18
KT30 vs V30	KT30	Biological Process	GO:0034641	cellular nitrogen compound metabolic process	4.27368	29.1126	72	2626	3.99767e-16
KT30 vs V30	KT30	Biological Process	GO:0044260	cellular macromolecule metabolic process	3.30859	44.6112	83	4024	8.59838e-12
KT30 vs V30	KT30	Biological Process	GO:0071704	organic substance metabolic process	3.0645	63.4247	98	5721	9.47684e-10
KT30 vs V30	KT30	Biological Process	GO:0043009	chordate embryonic development	5.86425	3.39241	17	306	4.50408e-08
KT30 vs V30	KT30	Biological Process	GO:0002262	myeloid cell homeostasis	12.4007	0.864731	9	78	1.84452e-07
KT30 vs V30	KT30	Biological Process	GO:0006414	translational elongation	28.9172	0.232812	5	21	2.74183e-06
KT30 vs V30	KT30	Biological Process	GO:0009790	embryo development	3.3827	7.51651	22	678	4.97613e-06
KT30 vs V30	KT30	Biological Process	GO:0002520	immune system development	4.2886	3.10416	12	280	6.43828e-05
KT30 vs V30	KT30	Biological Process	GO:0030218	erythrocyte differentiation	13.2089	0.442177	5	41	7.41346e-05
KT30 vs V30	KT30	Biological Process	GO:0051726	regulation of cell cycle	5.44477	1.82924	9	165	8.98914e-05
KT30 vs V30	KT30	Biological Process	GO:0048821	erythrocyte development	12.6515	0.365848	4	33	0.000460539
KT30 vs V30	KT30	Biological Process	GO:0030833	regulation of actin filament polymerization	8.54077	0.654091	5	59	0.000481424
KT30 vs V30	KT30	Biological Process	GO:0030832	regulation of actin filament length	8.23436	0.676264	5	61	0.000562058
KT30 vs V30	KT30	Biological Process	GO:0043254	regulation of protein complex assembly	7.94908	0.698436	5	63	0.000652433
KT30 vs V30	KT30	Biological Process	GO:0009987	cellular process	2.16905	100.431	116	9059	0.000693543
KT30 vs V30	KT30	Biological Process	GO:0030097	hemopoiesis	3.76648	2.58696	9	238	0.00114926
KT30 vs V30	KT30	Biological Process	GO:0008154	actin polymerization or depolymerization	6.48652	0.842558	5	76	0.00152909
KT30 vs V30	KT30	Biological Process	GO:0051693	actin filament capping	15.1845	0.232812	3	21	0.00153102
KT30 vs V30	KT30	Biological Process	GO:0072332	intrinsic apoptotic signaling pathway by p53 class mediator	45.2614	0.0665177	2	6	0.00177733
KT30 vs V30	KT30	Biological Process	GO:0032970	regulation of actin filament-based process	6.1385	0.886903	5	80	0.00192086
KT30 vs V30	KT30	Biological Process	GO:0030834	regulation of actin filament depolymerization	13.6637	0.254985	3	23	0.00200595
KT30 vs V30	KT30	Biological Process	GO:1901880	negative regulation of protein depolymerization	13.012	0.266071	3	24	0.00227406
KT30 vs V30	KT30	Biological Process	GO:0032272	negative regulation of protein polymerization	13.012	0.266071	3	24	0.00227406
KT30 vs V30	KT30	Biological Process	GO:0097190	apoptotic signaling pathway	12.4195	0.277157	3	25	0.00256337
KT30 vs V30	KT30	Biological Process	GO:0043244	regulation of protein complex disassembly	10.5053	0.321502	3	29	0.00394307
KT30 vs V30	KT30	Biological Process	GO:0042592	homeostatic process	2.88536	3.71391	10	335	0.00409435
KT30 vs V30	KT30	Biological Process	GO:1902904	negative regulation of supramolecular fiber organization	10.1154	0.332589	3	30	0.00434603
KT30 vs V30	KT30	Biological Process	GO:0051494	negative regulation of cytoskeleton organization	9.41616	0.354761	3	32	0.00522462
KT30 vs V30	KT30	Biological Process	GO:0090066	regulation of anatomical structure size	3.98404	1.60751	6	145	0.00549353
KT30 vs V30	KT30	Biological Process	GO:0009058	biosynthetic process	6.09142	0.71414	4	108	0.00558014
KT30 vs V30	KT30	Biological Process	GO:0060216	definitive hemopoiesis	8.53125	0.38802	3	35	0.00672985
KT30 vs V30	KT30	Biological Process	GO:0042541	hemoglobin biosynthetic process	18.0955	0.133035	2	12	0.00748656
KT30 vs V30	KT30	Biological Process	GO:0048513	animal organ development	1.80009	15.9199	26	1436	0.00764527
KT30 vs V30	KT30	Biological Process	GO:0043624	cellular protein complex disassembly	7.18059	0.454538	3	41	0.010446
KT30 vs V30	KT30	Biological Process	GO:0009159	deoxyribonucleoside monophosphate catabolic process	Inf	0.0110863	1	1	0.0110863
KT30 vs V30	KT30	Biological Process	GO:1990403	embryonic brain development	Inf	0.0110863	1	1	0.0110863
KT30 vs V30	KT30	Biological Process	GO:0001502	cartilage condensation	Inf	0.0110863	1	1	0.0110863
KT30 vs V30	KT30	Biological Process	GO:0043966	histone H3 acetylation	Inf	0.0110863	1	1	0.0110863
KT30 vs V30	KT30	Biological Process	GO:0032984	macromolecular complex disassembly	6.82042	0.476711	3	43	0.0119011
KT30 vs V30	KT30	Biological Process	GO:0006334	nucleosome assembly	12.0586	0.188467	2	17	0.014879
KT30 vs V30	KT30	Biological Process	GO:0006333	chromatin assembly or disassembly	11.304	0.199553	2	18	0.0166185
KT30 vs V30	KT30	Biological Process	GO:0001878	response to yeast	10.6381	0.21064	2	19	0.0184403
KT30 vs V30	KT30	Biological Process	GO:0045088	regulation of innate immune response	10.0463	0.221726	2	20	0.0203422
KT30 vs V30	KT30	Biological Process	GO:0010265	SCF complex assembly	89.8647	0.0221726	1	2	0.0220506
KT30 vs V30	KT30	Biological Process	GO:0035284	brain segmentation	89.8647	0.0221726	1	2	0.0220506
KT30 vs V30	KT30	Biological Process	GO:0043570	maintenance of DNA repeat elements	89.8647	0.0221726	1	2	0.0220506
KT30 vs V30	KT30	Biological Process	GO:0043623	cellular protein complex assembly	3.24879	1.61779	5	147	0.0231258
KT30 vs V30	KT30	Biological Process	GO:0006323	DNA packaging	8.60895	0.254985	2	23	0.0265094
KT30 vs V30	KT30	Biological Process	GO:0022900	electron transport chain	4.69663	0.676264	3	61	0.0300733
KT30 vs V30	KT30	Biological Process	GO:0097428	protein maturation by iron-sulfur cluster transfer	44.9286	0.0332589	1	3	0.0328942
KT30 vs V30	KT30	Biological Process	GO:0010172	embryonic body morphogenesis	44.9286	0.0332589	1	3	0.0328942
KT30 vs V30	KT30	Biological Process	GO:0044246	regulation of multicellular organismal metabolic process	44.9286	0.0332589	1	3	0.0328942
KT30 vs V30	KT30	Biological Process	GO:0032965	regulation of collagen biosynthetic process	44.9286	0.0332589	1	3	0.0328942
KT30 vs V30	KT30	Biological Process	GO:0035988	chondrocyte proliferation	44.9286	0.0332589	1	3	0.0328942
KT30 vs V30	KT30	Biological Process	GO:0065003	macromolecular complex assembly	2.23627	3.74717	8	338	0.0344131
KT30 vs V30	KT30	Biological Process	GO:0030036	actin cytoskeleton organization	2.47698	2.52767	6	228	0.0413541
KT30 vs V30	KT30	Biological Process	GO:1901207	regulation of heart looping	29.9499	0.0443452	1	4	0.0436185
KT30 vs V30	KT30	Biological Process	GO:0031145	anaphase-promoting complex-dependent catabolic process	29.9499	0.0443452	1	4	0.0436185
KT30 vs V30	KT30	Biological Process	GO:0014036	neural crest cell fate specification	29.9499	0.0443452	1	4	0.0436185
KT30 vs V30	KT30	Biological Process	GO:0006825	copper ion transport	29.9499	0.0443452	1	4	0.0436185
KT30 vs V30	KT30	Biological Process	GO:0051493	regulation of cytoskeleton organization	3.8049	0.825881	3	76	0.0497009
KT30 vs V30	KT30	Molecular Function	GO:0003735	structural constituent of ribosome	147.86	1.23562	59	126	1.40629e-88
KT30 vs V30	KT30	Molecular Function	GO:0019843	rRNA binding	69.6526	0.0974113	4	10	1.73388e-06
KT30 vs V30	KT30	Molecular Function	GO:0003723	RNA binding	3.95996	5.46081	19	576	2.14509e-06
KT30 vs V30	KT30	Molecular Function	GO:0048306	calcium-dependent protein binding	Inf	0.0196131	2	2	9.55203e-05
KT30 vs V30	KT30	Molecular Function	GO:0004364	glutathione transferase activity	34.108	0.0784523	2	8	0.00257292
KT30 vs V30	KT30	Molecular Function	GO:0008289	lipid binding	3.13519	2.35357	7	240	0.00948319
KT30 vs V30	KT30	Molecular Function	GO:0070694	deoxyribonucleoside 5'-monophosphate N-glycosidase activity	Inf	0.00980654	1	1	0.00980654
KT30 vs V30	KT30	Molecular Function	GO:0004454	ketohexokinase activity	Inf	0.00980654	1	1	0.00980654
KT30 vs V30	KT30	Molecular Function	GO:0031177	phosphopantetheine binding	Inf	0.00980654	1	1	0.00980654
KT30 vs V30	KT30	Molecular Function	GO:0016531	copper chaperone activity	Inf	0.00980654	1	1	0.00980654
KT30 vs V30	KT30	Molecular Function	GO:0003746	translation elongation factor activity	14.6099	0.156905	2	16	0.0104745
KT30 vs V30	KT30	Molecular Function	GO:0004579	dolichyl-diphosphooligosaccharide-protein glycotransferase activity	101.658	0.0196131	1	2	0.0195176
KT30 vs V30	KT30	Molecular Function	GO:0032137	guanine/thymine mispair binding	101.658	0.0196131	1	2	0.0195176
KT30 vs V30	KT30	Molecular Function	GO:0016743	carboxyl- or carbamoyltransferase activity	101.658	0.0196131	1	2	0.0195176
KT30 vs V30	KT30	Molecular Function	GO:0004128	cytochrome-b5 reductase activity, acting on NAD(P)H	101.658	0.0196131	1	2	0.0195176
KT30 vs V30	KT30	Molecular Function	GO:0008097	5S rRNA binding	101.658	0.0196131	1	2	0.0195176
KT30 vs V30	KT30	Molecular Function	GO:0005200	structural constituent of cytoskeleton	8.17545	0.264777	2	27	0.0285629
KT30 vs V30	KT30	Molecular Function	GO:0004462	lactoylglutathione lyase activity	50.8253	0.0294196	1	3	0.029134
KT30 vs V30	KT30	Molecular Function	GO:0018024	histone-lysine N-methyltransferase activity	7.56884	0.28439	2	29	0.0326222
KT30 vs V30	KT30	Molecular Function	GO:0001784	phosphotyrosine binding	33.8813	0.0392262	1	4	0.0386567
KT30 vs V30	KT30	Molecular Function	GO:0003691	double-stranded telomeric DNA binding	33.8813	0.0392262	1	4	0.0386567
KT30 vs V30	KT30	Molecular Function	GO:0016278	lysine N-methyltransferase activity	6.59043	0.323616	2	33	0.0413648
KT30 vs V30	KT30	Molecular Function	GO:0051219	phosphoprotein binding	25.4092	0.0490327	1	5	0.0480867
KT30 vs V30	KT30	Molecular Function	GO:0016651	oxidoreductase activity, acting on NAD(P)H	6.00771	0.353035	2	36	0.0484304
KT30 vs V30	KT30	Cellular Component	GO:0005840	ribosome	158.385	1.41636	59	127	3.94787e-87
KT30 vs V30	KT30	Cellular Component	GO:1990904	ribonucleoprotein complex	71.1381	2.46356	61	219	1.89155e-73
KT30 vs V30	KT30	Cellular Component	GO:0043228	non-membrane-bounded organelle	16.0411	9.55052	66	849	7.9922e-42
KT30 vs V30	KT30	Cellular Component	GO:0043229	intracellular organelle	6.74919	18.5136	55	1913	1.55842e-17
KT30 vs V30	KT30	Cellular Component	GO:0044464	cell part	3.71929	54.3267	86	4962	4.20146e-10
KT30 vs V30	KT30	Cellular Component	GO:0015934	large ribosomal subunit	80.9079	0.143738	6	13	2.57573e-09
KT30 vs V30	KT30	Cellular Component	GO:0015935	small ribosomal subunit	55.5853	0.179986	6	16	1.29846e-08
KT30 vs V30	KT30	Cellular Component	GO:0022625	cytosolic large ribosomal subunit	178.885	0.0337474	2	3	0.000373591
KT30 vs V30	KT30	Cellular Component	GO:0044446	intracellular organelle part	2.17722	16.1988	30	1440	0.000464424
KT30 vs V30	KT30	Cellular Component	GO:0008091	spectrin	59.6165	0.0562457	2	5	0.00122704
KT30 vs V30	KT30	Cellular Component	GO:0030863	cortical cytoskeleton	35.7628	0.078744	2	7	0.00253905
KT30 vs V30	KT30	Cellular Component	GO:0005746	mitochondrial respiratory chain	16.2462	0.146239	2	13	0.00902391
KT30 vs V30	KT30	Cellular Component	GO:0042788	polysomal ribosome	Inf	0.0112491	1	1	0.0112491
KT30 vs V30	KT30	Cellular Component	GO:0019866	organelle inner membrane	4.15077	1.02367	4	91	0.0192048
KT30 vs V30	KT30	Cellular Component	GO:0035145	exon-exon junction complex	88.6579	0.0224983	1	2	0.0223728
KT30 vs V30	KT30	Cellular Component	GO:0005854	nascent polypeptide-associated complex	88.6579	0.0224983	1	2	0.0223728
KT30 vs V30	KT30	Cellular Component	GO:0070776	MOZ/MORF histone acetyltransferase complex	88.6579	0.0224983	1	2	0.0223728
KT30 vs V30	KT30	Cellular Component	GO:0008250	oligosaccharyltransferase complex	88.6579	0.0224983	1	2	0.0223728
KT30 vs V30	KT30	Cellular Component	GO:0005740	mitochondrial envelope	3.21309	1.64238	5	146	0.0243404
KT30 vs V30	KT30	Cellular Component	GO:0044444	cytoplasmic part	2.08915	5.93091	11	1129	0.0303466
KT30 vs V30	KT30	Cellular Component	GO:0005791	rough endoplasmic reticulum	44.3246	0.0337474	1	3	0.0333725
KT30 vs V30	KT30	Cellular Component	GO:0005853	eukaryotic translation elongation factor 1 complex	29.5468	0.0449966	1	4	0.0442494
KT30 vs V30	KT30	Cellular Component	GO:0031975	envelope	2.64141	1.97985	5	176	0.0483035

## Sheet: T30up
Comparison	Condition	GO group	GO ID	GO term	Odds ratio	Expected count	Observed count	Size	Pvalue
T30 vs V30	T30	Biological Process	GO:1902908	regulation of melanosome transport	Inf	0.000744602	1	1	0.000744602
T30 vs V30	T30	Biological Process	GO:0021767	mammillary body development	1509.62	0.0014892	1	2	0.00148871
T30 vs V30	T30	Biological Process	GO:0005981	regulation of glycogen catabolic process	1509.62	0.0014892	1	2	0.00148871
T30 vs V30	T30	Biological Process	GO:0009251	glucan catabolic process	754.75	0.0022338	1	3	0.00223233
T30 vs V30	T30	Biological Process	GO:0044247	cellular polysaccharide catabolic process	754.75	0.0022338	1	3	0.00223233
T30 vs V30	T30	Biological Process	GO:0032881	regulation of polysaccharide metabolic process	754.75	0.0022338	1	3	0.00223233
T30 vs V30	T30	Biological Process	GO:0043470	regulation of carbohydrate catabolic process	754.75	0.0022338	1	3	0.00223233
T30 vs V30	T30	Biological Process	GO:0050728	negative regulation of inflammatory response	503.125	0.00297841	1	4	0.00297545
T30 vs V30	T30	Biological Process	GO:0021884	forebrain neuron development	377.312	0.00372301	1	5	0.00371808
T30 vs V30	T30	Biological Process	GO:0043467	regulation of generation of precursor metabolites and energy	377.312	0.00372301	1	5	0.00371808
T30 vs V30	T30	Biological Process	GO:0010906	regulation of glucose metabolic process	215.554	0.00595681	1	8	0.00594303
T30 vs V30	T30	Biological Process	GO:0021872	forebrain generation of neurons	188.594	0.00670141	1	9	0.0066837
T30 vs V30	T30	Biological Process	GO:0030212	hyaluronan metabolic process	167.625	0.00744602	1	10	0.00742387
T30 vs V30	T30	Biological Process	GO:0005977	glycogen metabolic process	150.85	0.00819062	1	11	0.00816356
T30 vs V30	T30	Biological Process	GO:0021854	hypothalamus development	125.688	0.00967982	1	13	0.00964146
T30 vs V30	T30	Biological Process	GO:0060341	regulation of cellular localization	88.6838	0.0134028	1	18	0.0133277
T30 vs V30	T30	Biological Process	GO:0051904	pigment granule transport	79.3355	0.014892	1	20	0.0147987
T30 vs V30	T30	Biological Process	GO:0035845	photoreceptor cell outer segment organization	79.3355	0.014892	1	20	0.0147987
T30 vs V30	T30	Biological Process	GO:0032401	establishment of melanosome localization	71.7679	0.0163812	1	22	0.0162678
T30 vs V30	T30	Biological Process	GO:0007034	vacuolar transport	65.5163	0.0178704	1	24	0.017735
T30 vs V30	T30	Biological Process	GO:0042462	eye photoreceptor cell development	60.265	0.0193596	1	26	0.0192002
T30 vs V30	T30	Biological Process	GO:0030203	glycosaminoglycan metabolic process	57.9423	0.0201042	1	27	0.0199321
T30 vs V30	T30	Biological Process	GO:0051336	regulation of hydrolase activity	10.4982	0.239762	2	322	0.0225049
T30 vs V30	T30	Biological Process	GO:0043666	regulation of phosphoprotein phosphatase activity	50.2	0.0230827	1	31	0.0228547
T30 vs V30	T30	Biological Process	GO:0048666	neuron development	10.2674	0.244974	2	329	0.0234319
T30 vs V30	T30	Biological Process	GO:0033059	cellular pigmentation	45.625	0.0253165	1	34	0.0250417
T30 vs V30	T30	Biological Process	GO:0031329	regulation of cellular catabolic process	45.625	0.0253165	1	34	0.0250417
T30 vs V30	T30	Biological Process	GO:0031347	regulation of defense response	44.2794	0.0260611	1	35	0.0257697
T30 vs V30	T30	Biological Process	GO:0032268	regulation of cellular protein metabolic process	9.63054	0.260611	2	350	0.0263084
T30 vs V30	T30	Biological Process	GO:0035303	regulation of dephosphorylation	43.0107	0.0268057	1	36	0.0264972
T30 vs V30	T30	Biological Process	GO:0030030	cell projection organization	8.99078	0.278481	2	374	0.0297673
T30 vs V30	T30	Biological Process	GO:0051650	establishment of vesicle localization	34.9855	0.0327625	1	44	0.0323
T30 vs V30	T30	Biological Process	GO:0044724	single-organism carbohydrate catabolic process	33.425	0.0342517	1	46	0.0337459
T30 vs V30	T30	Biological Process	GO:0019318	hexose metabolic process	32.6957	0.0349963	1	47	0.0344681
T30 vs V30	T30	Biological Process	GO:0044262	cellular carbohydrate metabolic process	31.3281	0.0364855	1	49	0.0359111
T30 vs V30	T30	Biological Process	GO:0015980	energy derivation by oxidation of organic compounds	26.3618	0.0431869	1	58	0.0423809
T30 vs V30	T30	Biological Process	GO:0046530	photoreceptor cell differentiation	25.464	0.0446761	1	60	0.0438134
T30 vs V30	T30	Biological Process	GO:0032101	regulation of response to external stimulus	25.464	0.0446761	1	60	0.0438134
T30 vs V30	T30	Biological Process	GO:0042254	ribosome biogenesis	23.8393	0.0476545	1	64	0.0466727
T30 vs V30	T30	Biological Process	GO:0022008	neurogenesis	6.90357	0.358898	2	482	0.0474402
T30 vs V30	T30	Biological Process	GO:0021953	central nervous system neuron differentiation	22.4086	0.0506329	1	68	0.0495243
T30 vs V30	T30	Cellular Component	GO:0016581	NuRD complex	851.167	0.00205419	1	3	0.00205299
T30 vs V30	T30	Cellular Component	GO:0000164	protein phosphatase type 1 complex	243.071	0.00547784	1	8	0.0054666
T30 vs V30	T30	Cellular Component	GO:0017053	transcriptional repressor complex	243.071	0.00547784	1	8	0.0054666
T30 vs V30	T30	Cellular Component	GO:0005871	kinesin complex	212.667	0.00616257	1	9	0.00614812
T30 vs V30	T30	Cellular Component	GO:0005930	axoneme	170.1	0.00753204	1	11	0.00750996
T30 vs V30	T30	Cellular Component	GO:0036064	ciliary basal body	154.621	0.00821677	1	12	0.00819028
T30 vs V30	T30	Cellular Component	GO:0009986	cell surface	141.722	0.0089015	1	13	0.0088702
T30 vs V30	T30	Cellular Component	GO:1903293	phosphatase complex	70.7778	0.0171183	1	25	0.0169981
T30 vs V30	T30	Cellular Component	GO:0070603	SWI/SNF superfamily-type complex	36.0603	0.0328671	1	48	0.0324171
T30 vs V30	T30	Cellular Component	GO:0044463	cell projection part	34.5816	0.0342365	1	50	0.033748
T30 vs V30	T30	Cellular Component	GO:0005929	cilium	26.4375	0.0445075	1	65	0.04368
T30 vs V30	T30	Molecular Function	GO:0008327	methyl-CpG binding	Inf	0.00100067	1	1	0.00100067
T30 vs V30	T30	Molecular Function	GO:0019888	protein phosphatase regulator activity	35.5833	0.0310207	1	31	0.0305897
T30 vs V30	T30	Molecular Function	GO:0004867	serine-type endopeptidase inhibitor activity	28.8378	0.0380254	1	38	0.0373751

## Sheet: T30down
Comparison	Condition	GO group	GO ID	GO term	Odds ratio	Expected count	Observed count	Size	Pvalue
T30 vs V30	T30	Biological Process	GO:0072511	divalent inorganic cation transport	25.3657	0.305204	6	119	4.83118e-07
T30 vs V30	T30	Biological Process	GO:0030001	metal ion transport	9.03548	0.98486	7	384	4.20308e-05
T30 vs V30	T30	Biological Process	GO:0098655	cation transmembrane transport	8.26389	1.07206	7	418	7.19945e-05
T30 vs V30	T30	Biological Process	GO:0070588	calcium ion transmembrane transport	20.8645	0.228262	4	89	7.42385e-05
T30 vs V30	T30	Biological Process	GO:0098660	inorganic ion transmembrane transport	8.12061	1.09001	7	425	7.99402e-05
T30 vs V30	T30	Biological Process	GO:0051209	release of sequestered calcium ion into cytosol	75.5172	0.0333416	2	13	0.000487903
T30 vs V30	T30	Biological Process	GO:1902656	calcium ion import into cytosol	69.2184	0.0359063	2	14	0.00056831
T30 vs V30	T30	Biological Process	GO:0051282	regulation of sequestering of calcium ion	63.8886	0.0384711	2	15	0.000654695
T30 vs V30	T30	Biological Process	GO:0051238	sequestering of metal ion	63.8886	0.0384711	2	15	0.000654695
T30 vs V30	T30	Biological Process	GO:0006816	calcium ion transport	59.775	0.0405068	2	18	0.000729784
T30 vs V30	T30	Biological Process	GO:0060401	cytosolic calcium ion transport	59.3202	0.0410358	2	16	0.000747029
T30 vs V30	T30	Biological Process	GO:0007204	positive regulation of cytosolic calcium ion concentration	55.3609	0.0436006	2	17	0.000845281
T30 vs V30	T30	Biological Process	GO:0032845	negative regulation of homeostatic process	55.3609	0.0436006	2	17	0.000845281
T30 vs V30	T30	Biological Process	GO:0055085	transmembrane transport	4.04217	2.86481	9	1117	0.00147356
T30 vs V30	T30	Biological Process	GO:0003010	voluntary skeletal muscle contraction	Inf	0.00256474	1	1	0.00256474
T30 vs V30	T30	Biological Process	GO:0007274	neuromuscular synaptic transmission	Inf	0.00256474	1	1	0.00256474
T30 vs V30	T30	Biological Process	GO:0031443	fast-twitch skeletal muscle fiber contraction	Inf	0.00256474	1	1	0.00256474
T30 vs V30	T30	Biological Process	GO:0006874	cellular calcium ion homeostasis	29.6256	0.0769422	2	30	0.00264812
T30 vs V30	T30	Biological Process	GO:0006811	ion transport	3.9654	2.13643	7	833	0.00439252
T30 vs V30	T30	Biological Process	GO:0021960	anterior commissure morphogenesis	401.833	0.00512948	1	2	0.00512311
T30 vs V30	T30	Biological Process	GO:0007263	nitric oxide mediated signal transduction	401.833	0.00512948	1	2	0.00512311
T30 vs V30	T30	Biological Process	GO:0001778	plasma membrane repair	401.833	0.00512948	1	2	0.00512311
T30 vs V30	T30	Biological Process	GO:0007624	ultradian rhythm	401.833	0.00512948	1	2	0.00512311
T30 vs V30	T30	Biological Process	GO:0071678	olfactory bulb axon guidance	401.833	0.00512948	1	2	0.00512311
T30 vs V30	T30	Biological Process	GO:0072507	divalent inorganic cation homeostasis	20.7172	0.107719	2	42	0.00514218
T30 vs V30	T30	Biological Process	GO:0035725	sodium ion transmembrane transport	16.56	0.133366	2	52	0.00779432
T30 vs V30	T30	Biological Process	GO:0030003	cellular cation homeostasis	15.6187	0.141061	2	55	0.00868741
T30 vs V30	T30	Biological Process	GO:0050918	positive chemotaxis	133.922	0.010259	1	4	0.0102208
T30 vs V30	T30	Biological Process	GO:0006809	nitric oxide biosynthetic process	133.922	0.010259	1	4	0.0102208
T30 vs V30	T30	Biological Process	GO:0055082	cellular chemical homeostasis	12.9224	0.169273	2	66	0.0123312
T30 vs V30	T30	Biological Process	GO:0050881	musculoskeletal movement	100.433	0.0128237	1	5	0.0127602
T30 vs V30	T30	Biological Process	GO:2001057	reactive nitrogen species metabolic process	100.433	0.0128237	1	5	0.0127602
T30 vs V30	T30	Biological Process	GO:0033292	T-tubule organization	100.433	0.0128237	1	5	0.0127602
T30 vs V30	T30	Biological Process	GO:0055065	metal ion homeostasis	12.1582	0.179532	2	70	0.0137956
T30 vs V30	T30	Biological Process	GO:0016049	cell growth	11.3207	0.192355	2	75	0.0157269
T30 vs V30	T30	Biological Process	GO:0033564	anterior/posterior axon guidance	66.9444	0.0179532	1	7	0.01782
T30 vs V30	T30	Biological Process	GO:0038007	netrin-activated signaling pathway	66.9444	0.0179532	1	7	0.01782
T30 vs V30	T30	Biological Process	GO:0008345	larval locomotory behavior	57.3762	0.0205179	1	8	0.0203405
T30 vs V30	T30	Biological Process	GO:0034599	cellular response to oxidative stress	50.2	0.0230827	1	9	0.0228547
T30 vs V30	T30	Biological Process	GO:0050801	ion homeostasis	8.77623	0.246215	2	96	0.0249987
T30 vs V30	T30	Biological Process	GO:0048846	axon extension involved in axon guidance	44.6185	0.0256474	1	10	0.0253627
T30 vs V30	T30	Biological Process	GO:0048668	collateral sprouting	44.6185	0.0256474	1	10	0.0253627
T30 vs V30	T30	Biological Process	GO:0051234	establishment of localization	2.35465	5.22694	10	2038	0.0265972
T30 vs V30	T30	Biological Process	GO:0001966	thigmotaxis	40.1533	0.0282121	1	11	0.0278645
T30 vs V30	T30	Biological Process	GO:0007205	protein kinase C-activating G-protein coupled receptor signaling pathway	36.5	0.0307769	1	12	0.03036
T30 vs V30	T30	Biological Process	GO:0007610	behavior	7.70158	0.279557	2	109	0.0316128
T30 vs V30	T30	Biological Process	GO:0048268	clathrin coat assembly	33.4556	0.0333416	1	13	0.0328494
T30 vs V30	T30	Biological Process	GO:0016358	dendrite development	33.4556	0.0333416	1	13	0.0328494
T30 vs V30	T30	Biological Process	GO:0006941	striated muscle contraction	30.8795	0.0359063	1	14	0.0353325
T30 vs V30	T30	Biological Process	GO:0048644	muscle organ morphogenesis	28.6714	0.0384711	1	15	0.0378095
T30 vs V30	T30	Biological Process	GO:0021955	central nervous system neuron axonogenesis	28.6714	0.0384711	1	15	0.0378095
T30 vs V30	T30	Biological Process	GO:0015672	monovalent inorganic cation transport	4.30144	0.759163	3	296	0.0394338
T30 vs V30	T30	Biological Process	GO:0072593	reactive oxygen species metabolic process	23.6059	0.0461653	1	18	0.0452036
T30 vs V30	T30	Biological Process	GO:0031103	axon regeneration	23.6059	0.0461653	1	18	0.0452036
T30 vs V30	T30	Biological Process	GO:0036269	swimming behavior	22.2926	0.04873	1	19	0.0476561
T30 vs V30	T30	Molecular Function	GO:0005219	ryanodine-sensitive calcium-release channel activity	182.232	0.0172115	2	6	0.000119692
T30 vs V30	T30	Molecular Function	GO:0005432	calcium:sodium antiporter activity	145.776	0.0200801	2	7	0.000167263
T30 vs V30	T30	Molecular Function	GO:0022890	inorganic cation transmembrane transporter activity	6.50224	1.26504	7	441	0.0002343
T30 vs V30	T30	Molecular Function	GO:0099604	ligand-gated calcium channel activity	66.235	0.0372915	2	13	0.000614505
T30 vs V30	T30	Molecular Function	GO:0005217	intracellular ligand-gated ion channel activity	52.0314	0.0458973	2	16	0.000940241
T30 vs V30	T30	Molecular Function	GO:0015085	calcium ion transmembrane transporter activity	34.9377	0.0653135	2	25	0.00192089
T30 vs V30	T30	Molecular Function	GO:0038006	netrin receptor activity involved in chemoattraction	Inf	0.00286858	1	1	0.00286858
T30 vs V30	T30	Molecular Function	GO:0015491	cation:cation antiporter activity	27.9944	0.0803202	2	28	0.00289781
T30 vs V30	T30	Molecular Function	GO:0022891	substrate-specific transmembrane transporter activity	3.81987	2.09693	7	731	0.00442798
T30 vs V30	T30	Molecular Function	GO:0004517	nitric-oxide synthase activity	355.857	0.00573716	1	2	0.00572912
T30 vs V30	T30	Molecular Function	GO:0008331	high voltage-gated calcium channel activity	355.857	0.00573716	1	2	0.00572912
T30 vs V30	T30	Molecular Function	GO:0005216	ion channel activity	4.71254	1.17899	5	411	0.00617992
T30 vs V30	T30	Molecular Function	GO:0005509	calcium ion binding	3.87757	1.73836	6	606	0.00726441
T30 vs V30	T30	Molecular Function	GO:0015297	antiporter activity	16.9075	0.129086	2	45	0.00735902
T30 vs V30	T30	Molecular Function	GO:0005262	calcium channel activity	16.2455	0.134139	2	49	0.00792681
T30 vs V30	T30	Molecular Function	GO:0022803	passive transmembrane transporter activity	4.3689	1.26791	5	442	0.00834246
T30 vs V30	T30	Molecular Function	GO:0005515	protein binding	2.19009	14.0645	22	5018	0.00878536
T30 vs V30	T30	Molecular Function	GO:0004526	ribonuclease P activity	118.603	0.0114743	1	4	0.0114262
T30 vs V30	T30	Molecular Function	GO:0001784	phosphotyrosine binding	118.603	0.0114743	1	4	0.0114262
T30 vs V30	T30	Molecular Function	GO:0017112	Rab guanyl-nucleotide exchange factor activity	118.603	0.0114743	1	4	0.0114262
T30 vs V30	T30	Molecular Function	GO:0005215	transporter activity	2.80289	3.25584	8	1135	0.0141541
T30 vs V30	T30	Molecular Function	GO:0051219	phosphoprotein binding	88.9464	0.0143429	1	5	0.0142627
T30 vs V30	T30	Molecular Function	GO:0022836	gated channel activity	4.44647	0.978185	4	341	0.0161658
T30 vs V30	T30	Molecular Function	GO:0005545	1-phosphatidylinositol binding	71.1524	0.0172115	1	6	0.0170913
T30 vs V30	T30	Molecular Function	GO:0010181	FMN binding	39.5185	0.0286858	1	10	0.0283267
T30 vs V30	T30	Molecular Function	GO:0004143	diacylglycerol kinase activity	32.329	0.0344229	1	12	0.0338973
T30 vs V30	T30	Molecular Function	GO:0003779	actin binding	4.06162	0.785991	3	274	0.0436023
T30 vs V30	T30	Cellular Component	GO:0030315	T-tubule	Inf	0.00234765	1	1	0.00234765
T30 vs V30	T30	Cellular Component	GO:0005891	voltage-gated calcium channel complex	31.8809	0.0727771	2	31	0.00235624
T30 vs V30	T30	Cellular Component	GO:0030677	ribonuclease P complex	443.391	0.00469529	1	2	0.00469001
T30 vs V30	T30	Cellular Component	GO:0009897	external side of plasma membrane	221.674	0.00704294	1	3	0.00702711
T30 vs V30	T30	Cellular Component	GO:0016459	myosin complex	13.5441	0.164335	2	70	0.0115741
T30 vs V30	T30	Cellular Component	GO:1905348	endonuclease complex	73.8623	0.0164335	1	7	0.016323
T30 vs V30	T30	Cellular Component	GO:0034703	cation channel complex	9.18091	0.23946	2	102	0.023588
T30 vs V30	T30	Cellular Component	GO:1902495	transmembrane transporter complex	6.6278	0.328671	2	140	0.0422212

## Sheet: T60down
Comparison	Condition	GO group	GO ID	GO term	Odds ratio	Expected count	Observed count	Size	Pvalue
T60 vs V60	T60	Biological Process	GO:0070293	renal absorption	6041.5	0.000496401	1	2	0.00049636
T60 vs V60	T60	Biological Process	GO:0071557	histone H3-K27 demethylation	3020.5	0.000744602	1	3	0.000744478
T60 vs V60	T60	Biological Process	GO:0016577	histone demethylation	2013.5	0.000992802	1	4	0.000992556
T60 vs V60	T60	Biological Process	GO:0008214	protein dealkylation	1510	0.001241	1	5	0.00124059
T60 vs V60	T60	Biological Process	GO:0061384	heart trabecula morphogenesis	1006.5	0.0017374	1	7	0.00173654
T60 vs V60	T60	Biological Process	GO:0070988	demethylation	548.773	0.00297841	1	12	0.0029757
T60 vs V60	T60	Biological Process	GO:0060319	primitive erythrocyte differentiation	464.269	0.00347481	1	14	0.00347107
T60 vs V60	T60	Biological Process	GO:0071526	semaphorin-plexin signaling pathway	335.167	0.00471581	1	19	0.00470879
T60 vs V60	T60	Biological Process	GO:0031101	fin regeneration	113.5	0.0134028	1	54	0.0133441
T60 vs V60	T60	Biological Process	GO:0035162	embryonic hemopoiesis	98.5492	0.0153884	1	62	0.0153109
T60 vs V60	T60	Biological Process	GO:0034101	erythrocyte homeostasis	81.1486	0.018615	1	75	0.0185013
T60 vs V60	T60	Biological Process	GO:0006898	receptor-mediated endocytosis	75.981	0.019856	1	80	0.0197265
T60 vs V60	T60	Biological Process	GO:0048872	homeostasis of number of cells	68.9483	0.0218416	1	88	0.0216848
T60 vs V60	T60	Biological Process	GO:0016569	covalent chromatin modification	58.7353	0.0255647	1	103	0.0253495
T60 vs V60	T60	Biological Process	GO:0031099	regeneration	51.5862	0.0290395	1	117	0.0287616
T60 vs V60	T60	Biological Process	GO:0030099	myeloid cell differentiation	50.2731	0.0297841	1	120	0.0294918
T60 vs V60	T60	Biological Process	GO:0042060	wound healing	40.8836	0.0364855	1	147	0.0360465
T60 vs V60	T60	Biological Process	GO:0048589	developmental growth	31.1335	0.0476545	1	192	0.0469053
T60 vs V60	T60	Molecular Function	GO:0071558	histone demethylase activity (H3-K27 specific)	3746.25	0.0006004	1	3	0.00060032
T60 vs V60	T60	Molecular Function	GO:0032451	demethylase activity	1498.2	0.0012008	1	6	0.0012004
T60 vs V60	T60	Molecular Function	GO:0017154	semaphorin receptor activity	415.806	0.00380254	1	19	0.00379797
